# Supplementary material for: Metformin therapy associated with survival benefit in lung cancer patients with diabetes
Source: Oncotarget. 2016 Apr 20;7(23):35437–45. doi: 10.18632/oncotarget.8881 (PMC5085241; doi:10.18632/oncotarget.8881)
Supplement: Supplementary file 1 [file oncotarget-07-35437-s001.pdf]

## Metformin therapy associated with survival benefit in lung cancer patients with diabetes

### Supplementary Material

Table 1S. The quality assessment of the included studies appraised in reference to the Newcastle-Ottawa statement

| First author, year | Country | Selection (4) |   |   |   | Comparability (2) |   | Outcome (3) |   |   | Total |
|--------------------|---------|---------------|---|---|---|-------------------|---|-------------|---|---|-------|
| Ahmed,2015[19]     | USA     | ▲             | ▲ | ▲ |   | ▲                 | ▲ | ▲           | ▲ | ▲ | 8     |
| Kong,2015[21]      | China   | ▲             | ▲ |   |   | ▲                 | ▲ | ▲           | ▲ | ▲ | 7     |
| Cuurie,2012[22]    | UK      | ▲             | ▲ |   |   | ▲                 | ▲ | ▲           | ▲ |   | 6     |
| Xu,2015[18]        | China   | ▲             | ▲ |   |   | ▲                 | ▲ | ▲           | ▲ | ▲ | 7     |
| Tan,2011[17]       | China   | ▲             | ▲ |   |   | ▲                 | ▲ | ▲           | ▲ |   | 6     |
| Lin,2015[23]       | USA     | ▲             | ▲ | ▲ |   | ▲                 | ▲ | ▲           | ▲ | ▲ | 8     |
| Chen,2015[24]      | China   | ▲             | ▲ | ▲ |   | ▲                 | ▲ | ▲           | ▲ |   | 7     |
| Mazzone,2012[25]   | USA     | ▲             | ▲ | ▲ | ▲ | ▲                 |   | ▲           | ▲ |   | 7     |
| Xu,2015[26]        | USA     | ▲             | ▲ | ▲ |   | ▲                 |   | ▲           | ▲ |   | 6     |
| Wink,2016[27]      | Germany | ▲             | ▲ | ▲ |   | ▲                 | ▲ | ▲           | ▲ |   | 7     |
